# Supplementary material for: Dietary Patterns of Breastfeeding Mothers and Human Milk Composition: Data from the Italian MEDIDIET Study
Source: MDPI journal article supplement (doi:10.3390/nu13051722), 2021-05-19
Supplement: s1 [file s1]

**Supplementary Table 1.** Factorability of the correlation matrix of the maternal nutrient intakes: Bartlett's test of sphericity and measures of sampling adequacy.

|                                                                                              |                                                                                                                                                                                                                                                                 |
|----------------------------------------------------------------------------------------------|-----------------------------------------------------------------------------------------------------------------------------------------------------------------------------------------------------------------------------------------------------------------|
| <b>Bartlett's test of sphericity:</b> p-value< 0.0001                                        |                                                                                                                                                                                                                                                                 |
| <b>Kaiser-Meyer-Olkin statistic – overall measure of sampling adequacy<sup>1</sup>:</b> 0.86 |                                                                                                                                                                                                                                                                 |
| <b>Individual measures of sampling adequacy:</b>                                             |                                                                                                                                                                                                                                                                 |
| mediocre                                                                                     | lycopene (0.68), retinol (0.58)                                                                                                                                                                                                                                 |
| middling                                                                                     | soluble carbohydrates (0.78), starch (0.76), DHA (0.71), EPA (0.71)                                                                                                                                                                                             |
| meritorious                                                                                  | sodium (0.89), vitamin D (0.88), LA (0.88), vegetable protein (0.87), MUFA (0.86), phosphorus (0.86), SFA (0.86), cholesterol (0.86), riboflavin (0.85), calcium (0.85), fibre (0.84), folate (0.84), vitamin E (0.83), vitamin C (0.83), AA (0.80), DPA (0.80) |
| marvellous                                                                                   | potassium (0.93), vitamin B6 (0.92), iron (0.92), beta-carotene eq. (0.91), niacin (0.90), zinc (0.90), ALA (0.90), thiamin (0.90), animal protein (0.90)                                                                                                       |

<sup>1</sup>Overall and individual measures of sampling adequacy range between 0 and 1, with values > 0.60 indicating a satisfactory size.

AA: arachidonic acid; ALA:  $\alpha$ -linolenic acid; DHA: docosahexaenoic acid; DPA: docosapentaenoic acid; EPA: eicosapentaenoic acid; LA: linoleic acid; MUFA: monounsaturated fatty acids; SFA: saturated fatty acids.
