# Supplementary material for: Dietary Patterns of Breastfeeding Mothers and Human Milk Composition: Data from the Italian MEDIDIET Study
Source: MDPI journal article supplement (doi:10.3390/nu13051722), 2021-05-19
Supplement: s1 [file s1]

**Supplementary Table 2.** Nutrient's factor loadings<sup>1</sup> and explained variance for the five maternal dietary patterns identified in the MEDIDIET study, using principal component factor analysis (PCFA).

| Nutrient                                 | Vitamins, minerals and fibres | Proteins and fatty acids with legs | Fatty acids with fins | Fatty acids with leaves | Starch and vegetable proteins | Communalities |
|------------------------------------------|-------------------------------|------------------------------------|-----------------------|-------------------------|-------------------------------|---------------|
| Soluble carbohydrates                    | 0.59                          | 0.49                               | -                     | -0.11                   | 0.16                          | 0.64          |
| Starch                                   | 0.15                          | 0.18                               | -                     | 0.20                    | <b>0.90</b>                   | 0.92          |
| Animal protein                           | 0.15                          | <b>0.78</b>                        | 0.50                  | 0.13                    | -                             | 0.90          |
| Vegetable protein                        | 0.47                          | 0.14                               | -                     | 0.34                    | <b>0.78</b>                   | 0.97          |
| SFA                                      | 0.10                          | <b>0.76</b>                        | -                     | 0.50                    | 0.12                          | 0.85          |
| MUFA                                     | 0.27                          | 0.46                               | 0.12                  | <b>0.77</b>             | -                             | 0.89          |
| LA                                       | 0.25                          | 0.43                               | 0.23                  | <b>0.69</b>             | 0.25                          | 0.84          |
| AA                                       | -                             | 0.52                               | 0.58                  | 0.20                    | 0.19                          | 0.68          |
| ALA                                      | 0.43                          | 0.52                               | 0.14                  | <b>0.63</b>             | 0.16                          | 0.90          |
| EPA                                      | 0.18                          | -                                  | <b>0.92</b>           | 0.10                    | -                             | 0.90          |
| DHA                                      | 0.21                          | -                                  | <b>0.90</b>           | -                       | -                             | 0.86          |
| DPA                                      | -                             | 0.33                               | <b>0.80</b>           | -                       | 0.12                          | 0.76          |
| Cholesterol                              | 0.18                          | <b>0.76</b>                        | 0.37                  | 0.21                    | 0.16                          | 0.81          |
| Fibre                                    | <b>0.82</b>                   | 0.12                               | -                     | 0.20                    | 0.38                          | 0.87          |
| Calcium                                  | 0.35                          | <b>0.76</b>                        | -                     | 0.21                    | -                             | 0.75          |
| Phosphorus                               | 0.42                          | <b>0.73</b>                        | 0.23                  | 0.27                    | 0.29                          | 0.92          |
| Potassium                                | <b>0.78</b>                   | 0.39                               | 0.21                  | 0.26                    | 0.21                          | 0.92          |
| Iron                                     | <b>0.71</b>                   | 0.37                               | 0.26                  | 0.32                    | 0.33                          | 0.92          |
| Zinc                                     | 0.37                          | <b>0.63</b>                        | 0.38                  | 0.32                    | 0.37                          | 0.91          |
| Sodium                                   | 0.15                          | 0.47                               | 0.15                  | -                       | <b>0.72</b>                   | 0.79          |
| Retinol                                  | 0.14                          | 0.35                               | -                     | -                       | 0.14                          | 0.16          |
| Thiamin                                  | 0.54                          | 0.49                               | 0.23                  | 0.34                    | 0.40                          | 0.85          |
| Riboflavin                               | 0.55                          | <b>0.68</b>                        | 0.15                  | 0.12                    | 0.21                          | 0.85          |
| Niacin                                   | 0.48                          | 0.39                               | 0.54                  | 0.22                    | 0.28                          | 0.79          |
| Vitamin B6                               | 0.62                          | 0.46                               | 0.38                  | 0.26                    | 0.23                          | 0.87          |
| Folate                                   | <b>0.78</b>                   | 0.27                               | 0.16                  | 0.23                    | 0.29                          | 0.85          |
| Vitamin C                                | <b>0.76</b>                   | 0.19                               | 0.10                  | -                       | -                             | 0.64          |
| Vitamin D                                | 0.21                          | 0.23                               | <b>0.84</b>           | 0.20                    | -                             | 0.84          |
| Vitamin E                                | <b>0.66</b>                   | 0.22                               | 0.17                  | <b>0.65</b>             | -                             | 0.93          |
| Beta-carotene eq.                        | <b>0.73</b>                   | -                                  | -                     | 0.33                    | -0.17                         | 0.68          |
| Lycopene                                 | -                             | -                                  | -                     | <b>0.67</b>             | 0.19                          | 0.87          |
| <b>Explained variance (%)</b>            | <b>21.77</b>                  | <b>21.05</b>                       | <b>15.38</b>          | <b>12.07</b>            | <b>10.31</b>                  |               |
| <b>Cumulative explained variance (%)</b> | <b>21.77</b>                  | <b>42.82</b>                       | <b>58.19</b>          | <b>70.26</b>            | <b>80.57</b>                  |               |

<sup>1</sup>Estimates from a PCFA performed on 31 maternal nutrient intakes. Each nutrient's factor loading represents how strongly that nutrient is associated with dietary patterns. Nutrient's factor loadings  $\geq 0.63$  represented "dominant nutrients" for each dietary pattern, and were shown in bold typeface; nutrient's factor loadings smaller than 0.1 were suppressed.

AA: arachidonic acid; ALA:  $\alpha$ -linolenic acid; DHA: docosahexaenoic acid; DPA: docosapentaenoic acid; EPA: eicosapentaenoic acid; LA: linoleic acid.
