# Supplementary material for: Dietary Patterns of Breastfeeding Mothers and Human Milk Composition: Data from the Italian MEDIDIET Study
Source: MDPI journal article supplement (doi:10.3390/nu13051722), 2021-05-19
Supplement: s1 [file s1]

**Supplementary table 4.** Baseline maternal characteristics and quartiles of the five maternal dietary patterns. Italy, 2012-2014.

|                                           | Age        | BMI        | Geographical area |           |          | Tobacco smoking <sup>1</sup> |                   |
|-------------------------------------------|------------|------------|-------------------|-----------|----------|------------------------------|-------------------|
|                                           | mean (SD)  | mean (SD)  | North, %          | Center, % | South, % | Never smokers, %             | Former smokers, % |
|                                           |            |            | Tor               | Fir Rom   | SGR Pal  |                              |                   |
| <b>Vitamins, minerals and fibre</b>       |            |            |                   |           |          |                              |                   |
| I quartile                                | 32.0 (3.7) | 22.8 (3.7) | 24.55             | 20.29     | 28.10    | 27.47                        | 21.19             |
| II quartile                               | 32.5 (4.1) | 22.3 (3.2) | 22.73             | 15.94     | 32.23    | 23.63                        | 27.12             |
| III quartile                              | 32.9 (4.1) | 22.2 (2.9) | 25.45             | 23.19     | 25.62    | 23.63                        | 27.12             |
| IV quartile                               | 33.1 (4.4) | 21.9 (3.0) | 27.27             | 40.58     | 14.05    | 25.27                        | 24.58             |
| <i>p-value</i> <sup>2</sup>               | 0.3417     | 0.3241     |                   | 0.0042    |          | 0.0654                       |                   |
| <b>Proteins and fatty acids with legs</b> |            |            |                   |           |          |                              |                   |
| I quartile                                | 32.9 (4.0) | 22.3 (3.2) | 28.18             | 24.64     | 22.31    | 24.73                        | 25.42             |
| II quartile                               | 32.8 (4.3) | 22.6 (3.3) | 25.45             | 23.19     | 25.62    | 26.37                        | 22.88             |
| III quartile                              | 32.1 (4.0) | 21.9 (2.9) | 19.09             | 28.99     | 28.10    | 24.18                        | 26.27             |
| IV quartile                               | 32.6 (4.2) | 22.5 (3.4) | 27.27             | 23.19     | 23.97    | 24.73                        | 25.42             |
| <i>p-value</i> <sup>2</sup>               | 0.5747     | 0.5355     |                   | 0.7137    |          | 0.9183                       |                   |
| <b>Fatty acids with fins</b>              |            |            |                   |           |          |                              |                   |
| I quartile                                | 32.0 (3.7) | 22.0 (3.2) | 28.18             | 23.19     | 23.14    | 25.82                        | 23.73             |
| II quartile                               | 32.6 (4.3) | 22.3 (3.2) | 28.18             | 17.39     | 26.45    | 26.92                        | 22.03             |
| III quartile                              | 32.7 (4.4) | 22.5 (3.4) | 21.82             | 23.19     | 28.93    | 23.63                        | 27.12             |
| IV quartile                               | 33.1 (4.1) | 22.4 (3.2) | 21.82             | 36.23     | 21.49    | 23.63                        | 27.12             |
| <i>p-value</i> <sup>2</sup>               | 0.3417     | 0.8181     |                   | 0.1940    |          | 0.6803                       |                   |
| <b>Fatty acids with leaves</b>            |            |            |                   |           |          |                              |                   |
| I quartile                                | 32.0 (4.1) | 22.5 (3.0) | 13.64             | 18.84     | 38.84    | 26.37                        | 22.88             |
| II quartile                               | 32.0 (3.9) | 22.3 (3.6) | 18.18             | 20.29     | 33.88    | 26.92                        | 22.03             |
| III quartile                              | 33.3 (4.4) | 22.8 (3.1) | 33.64             | 24.64     | 17.36    | 23.08                        | 27.97             |
| IV quartile                               | 33.2 (3.9) | 21.7 (3.0) | 34.55             | 36.23     | 9.92     | 23.63                        | 27.12             |
| <i>p-value</i> <sup>2</sup>               | 0.0734     | 0.1893     |                   | <0.0001   |          | 0.5585                       |                   |
| <b>Starch and vegetable proteins</b>      |            |            |                   |           |          |                              |                   |
| I quartile                                | 32.6 (4.4) | 22.3 (2.9) | 32.73             | 20.29     | 20.66    | 27.47                        | 21.19             |
| II quartile                               | 32.6 (3.3) | 21.8 (3.1) | 29.09             | 24.64     | 21.49    | 24.18                        | 26.27             |
| III quartile                              | 32.8 (4.2) | 22.8 (3.5) | 23.64             | 24.64     | 26.45    | 24.18                        | 26.27             |
| IV quartile                               | 32.5 (4.5) | 22.3 (3.3) | 14.55             | 30.43     | 31.40    | 24.18                        | 26.27             |
| <i>p-value</i> <sup>2</sup>               | 0.9656     | 0.3244     |                   | 0.0387    |          | 0.6803                       |                   |

<sup>1</sup> Being current smokers was an exclusion criterion, participants were categorized in never vs former smokers. <sup>2</sup>p-value for age and BMI were from ANOVA; p-value for geographical area and tobacco smoking were from chi-square test.

BMI: body mass index, SD: standard deviation
