# Supplementary material for: Dietary Patterns of Breastfeeding Mothers and Human Milk Composition: Data from the Italian MEDIDIET Study
Source: MDPI journal article supplement (doi:10.3390/nu13051722), 2021-05-19
Supplement: s1 [file s1]

**Supplementary Table 3.** Mean  $\pm$  SD of human milk contents according to quartiles of the five maternal dietary patterns. Italy, 2012-2014.

| Milk component                              | Vitamins, minerals and fibre |               |               |               | p-value <sup>1</sup> |
|---------------------------------------------|------------------------------|---------------|---------------|---------------|----------------------|
|                                             | Q1                           | Q2            | Q3            | Q4            |                      |
|                                             | mean (SD)                    | mean (SD)     | mean (SD)     | mean (SD)     |                      |
| Energy (kcal/100ml) <sup>2</sup>            | 58.21 (12.14)                | 58.74 (8.94)  | 56.33 (9.63)  | 56.67 (10.85) | 0.4253               |
| Lactose (g/100ml) <sup>2</sup>              | 6.79 (0.17)                  | 6.8 (0.13)    | 6.82 (0.15)   | 6.80 (0.18)   | 0.8373               |
| Protein (g/100ml) <sup>2</sup>              | 0.87 (0.19)                  | 0.9 (0.17)    | 0.94 (0.16)   | 0.88 (0.19)   | 0.1012               |
| Fat (g/100ml) <sup>2</sup>                  | 3.18 (1.52)                  | 3.22 (1.10)   | 2.92 (1.19)   | 2.99 (1.38)   | 0.4293               |
| SFA (% of FA) <sup>3</sup>                  | 41.87 (4.38)                 | 42.63 (4.58)  | 41.92 (5.03)  | 41.22 (5.60)  | 0.4132               |
| MUFA (% of FA) <sup>3</sup>                 | 44.00 (4.41)                 | 43.47 (4.49)  | 44.14 (4.95)  | 44.63 (5.36)  | 0.5631               |
| PUFA (% of FA) <sup>3</sup>                 | 13.66 (2.39)                 | 13.48 (2.56)  | 13.52 (2.31)  | 13.72 (2.87)  | 0.9352               |
| $\omega$ -6 (% of FA) <sup>3</sup>          | 12.54 (2.39)                 | 12.37 (2.53)  | 12.22 (2.31)  | 12.40 (2.83)  | 0.9001               |
| LA (% of FA) <sup>3</sup>                   | 11.03 (2.34)                 | 10.91 (2.40)  | 10.74 (2.29)  | 10.88 (2.75)  | 0.9140               |
| AA (% of FA) <sup>3</sup>                   | 0.48 (0.09)                  | 0.46 (0.08)   | 0.46 (0.08)   | 0.48 (0.08)   | 0.1229               |
| $\omega$ -3 (% FA) <sup>3</sup>             | 1.12 (0.24)                  | 1.11 (0.35)   | 1.29 (0.63)   | 1.32 (0.44)   | 0.0029               |
| ALA (% of FA) <sup>3</sup>                  | 0.52 (0.15)                  | 0.51 (0.16)   | 0.54 (0.17)   | 0.58 (0.17)   | 0.0507               |
| EPA (% of FA) <sup>3</sup>                  | 0.05 (0.02)                  | 0.05 (0.04)   | 0.06 (0.06)   | 0.07 (0.05)   | 0.0195               |
| DHA (% of FA) <sup>3</sup>                  | 0.25 (0.1)                   | 0.25 (0.13)   | 0.35 (0.36)   | 0.32 (0.18)   | 0.0093               |
| DPA (% of FA) <sup>3</sup>                  | 0.11 (0.03)                  | 0.11 (0.04)   | 0.13 (0.08)   | 0.13 (0.05)   | 0.0273               |
| $\omega$ -6/ $\omega$ -3 ratio <sup>3</sup> | 11.76 (3.32)                 | 11.97 (3.59)  | 10.75 (4.19)  | 10.12 (3.39)  | 0.009                |
| LA/ALA ratio <sup>3</sup>                   | 22.61 (6.51)                 | 23.08 (7.65)  | 21.56 (7.59)  | 20.05 (7.61)  | 0.0780               |
| AA/EPA ratio <sup>3</sup>                   | 12.41 (4.24)                 | 12.13 (5.32)  | 10.38 (4.69)  | 9.71 (4.44)   | 0.0012               |
| EPA/DHA ratio <sup>3</sup>                  | 0.18 (0.06)                  | 0.20 (0.08)   | 0.19 (0.06)   | 0.20 (0.07)   | 0.2321               |
| AA/DHA ratio <sup>3</sup>                   | 2.17 (0.80)                  | 2.15 (0.84)   | 1.86 (0.93)   | 1.83 (0.77)   | 0.0193               |
| LA/DHA ratio <sup>3</sup>                   | 50.86 (23.28)                | 52.35 (23.22) | 46.09 (30.12) | 41.12 (17.22) | 0.0277               |
| Proteins and fatty acids with legs          |                              |               |               |               |                      |
| Energy (kcal/100ml) <sup>2</sup>            | 57.15 (10.19)                | 58.44 (10.98) | 56.41 (9.23)  | 57.94 (11.36) | 0.6533               |
| Lactose (g/100ml) <sup>2</sup>              | 6.81 (0.14)                  | 6.80 (0.15)   | 6.79 (0.19)   | 6.81 (0.16)   | 0.9086               |
| Protein (g/100ml) <sup>2</sup>              | 0.88 (0.19)                  | 0.88 (0.17)   | 0.92 (0.17)   | 0.90 (0.19)   | 0.5100               |
| Fat (g/100ml) <sup>2</sup>                  | 3.04 (1.27)                  | 3.18 (1.35)   | 2.95 (1.16)   | 3.13 (1.43)   | 0.7157               |
| SFA (% of FA) <sup>3</sup>                  | 41.19 (5.25)                 | 41.91 (5.57)  | 42.28 (3.56)  | 42.30 (5.05)  | 0.5098               |
| MUFA (% of FA) <sup>3</sup>                 | 45.00 (5.30)                 | 44.23 (5.11)  | 43.67 (4.00)  | 43.28 (4.61)  | 0.1709               |
| PUFA (% of FA) <sup>3</sup>                 | 13.41 (2.50)                 | 13.42 (2.38)  | 13.60 (2.46)  | 13.95 (2.77)  | 0.5594               |
| $\omega$ -6 (% of FA) <sup>3</sup>          | 12.12 (2.40)                 | 12.24 (2.37)  | 12.50 (2.45)  | 12.69 (2.81)  | 0.5422               |
| LA (% of FA) <sup>3</sup>                   | 10.66 (2.34)                 | 10.77 (2.30)  | 10.97 (2.40)  | 11.17 (2.71)  | 0.6330               |
| AA (% of FA) <sup>3</sup>                   | 0.45 (0.08)                  | 0.46 (0.08)   | 0.48 (0.09)   | 0.49 (0.09)   | 0.0473               |
| $\omega$ -3 (% FA) <sup>3</sup>             | 1.29 (0.60)                  | 1.18 (0.31)   | 1.09 (0.25)   | 1.26 (0.52)   | 0.0339               |
| ALA (% of FA) <sup>3</sup>                  | 0.56 (0.18)                  | 0.52 (0.14)   | 0.50 (0.14)   | 0.57 (0.18)   | 0.0354               |
| EPA (% of FA) <sup>3</sup>                  | 0.07 (0.06)                  | 0.05 (0.03)   | 0.05 (0.03)   | 0.06 (0.04)   | 0.0559               |
| DHA (% of FA) <sup>3</sup>                  | 0.34 (0.29)                  | 0.30 (0.14)   | 0.24 (0.10)   | 0.30 (0.28)   | 0.0640               |
| DPA (% of FA) <sup>3</sup>                  | 0.13 (0.07)                  | 0.11 (0.04)   | 0.11 (0.04)   | 0.13 (0.07)   | 0.3864               |
| $\omega$ -6/ $\omega$ -3 ratio <sup>3</sup> | 10.59 (3.76)                 | 10.97 (3.29)  | 12.01 (3.88)  | 11.09 (3.77)  | 0.1280               |
| LA/ALA ratio <sup>3</sup>                   | 20.93 (8.01)                 | 21.97 (7.08)  | 23.32 (7.37)  | 21.14 (7.01)  | 0.2058               |
| AA/EPA ratio <sup>3</sup>                   | 10.48 (5.36)                 | 10.47 (4.15)  | 12.61 (4.87)  | 11.16 (4.56)  | 0.0229               |
| EPA/DHA ratio <sup>3</sup>                  | 0.20 (0.08)                  | 0.18 (0.05)   | 0.19 (0.06)   | 0.20 (0.06)   | 0.3407               |
| AA/DHA ratio <sup>3</sup>                   | 1.86 (0.92)                  | 1.87 (0.85)   | 2.17 (0.68)   | 2.14 (0.91)   | 0.0378               |
| LA/DHA ratio <sup>3</sup>                   | 44.18 (24.59)                | 44.57 (21.99) | 51.89 (24.92) | 50.35 (25.03) | 0.1303               |
| Fatty acids with fins                       |                              |               |               |               |                      |

|                                  |               |               |               |               |        |
|----------------------------------|---------------|---------------|---------------|---------------|--------|
| Energy (kcal/100ml) <sup>2</sup> | 58.71 (9.69)  | 56.49 (10.47) | 57.05 (10.53) | 57.68 (11.15) | 0.6041 |
| Lactose (g/100ml) <sup>2</sup>   | 6.81 (0.14)   | 6.81 (0.17)   | 6.79 (0.18)   | 6.80 (0.16)   | 0.8654 |
| Protein (g/100ml) <sup>2</sup>   | 0.91 (0.19)   | 0.88 (0.15)   | 0.93 (0.19)   | 0.87 (0.18)   | 0.1766 |
| Fat (g/100ml) <sup>2</sup>       | 3.21 (1.20)   | 2.96 (1.30)   | 3.03 (1.31)   | 3.11 (1.40)   | 0.6777 |
| SFA (% of FA) <sup>3</sup>       | 42.21 (4.34)  | 42.24 (4.91)  | 42.07 (4.91)  | 41.25 (5.36)  | 0.5767 |
| MUFA (% of FA) <sup>3</sup>      | 43.68 (4.38)  | 44.09 (4.72)  | 43.75 (4.64)  | 44.60 (5.37)  | 0.6445 |
| PUFA (% of FA) <sup>3</sup>      | 13.65 (2.56)  | 13.23 (2.42)  | 13.76 (2.53)  | 13.72 (2.60)  | 0.5797 |
| ω-6 (% of FA) <sup>3</sup>       | 12.53 (2.61)  | 12.11 (2.38)  | 12.53 (2.48)  | 12.37 (2.58)  | 0.7307 |
| LA (% of FA) <sup>3</sup>        | 11.04 (2.50)  | 10.60 (2.32)  | 11.03 (2.41)  | 10.89 (2.52)  | 0.6942 |
| AA (% of FA) <sup>3</sup>        | 0.46 (0.09)   | 0.47 (0.08)   | 0.47 (0.09)   | 0.48 (0.08)   | 0.6545 |
| ω-3 (% FA) <sup>3</sup>          | 1.12 (0.36)   | 1.11 (0.27)   | 1.23 (0.43)   | 1.35 (0.60)   | 0.0038 |
| ALA (% of FA) <sup>3</sup>       | 0.53 (0.17)   | 0.51 (0.14)   | 0.53 (0.17)   | 0.57 (0.18)   | 0.1014 |
| EPA (% of FA) <sup>3</sup>       | 0.04 (0.03)   | 0.05 (0.02)   | 0.06 (0.05)   | 0.07 (0.06)   | 0.0004 |
| DHA (% of FA) <sup>3</sup>       | 0.23 (0.12)   | 0.25 (0.12)   | 0.31 (0.20)   | 0.36 (0.33)   | 0.0013 |
| DPA (% of FA) <sup>3</sup>       | 0.11 (0.05)   | 0.11 (0.03)   | 0.12 (0.05)   | 0.14 (0.08)   | 0.0276 |
| ω-6/ω-3 ratio <sup>3</sup>       | 12.05 (4.09)  | 11.42 (3.33)  | 11.06 (3.47)  | 10.31 (3.75)  | 0.0426 |
| LA/ALA ratio <sup>3</sup>        | 22.57 (7.77)  | 22.11 (6.58)  | 22.35 (7.76)  | 20.56 (7.41)  | 0.3474 |
| AA/EPA ratio <sup>3</sup>        | 12.62 (4.66)  | 12.06 (4.46)  | 10.84 (4.85)  | 9.50 (4.72)   | 0.0004 |
| EPA/DHA ratio <sup>3</sup>       | 0.19 (0.06)   | 0.19 (0.06)   | 0.19 (0.07)   | 0.20 (0.07)   | 0.4675 |
| AA/DHA ratio <sup>3</sup>        | 2.29 (0.87)   | 2.15 (0.75)   | 1.87 (0.85)   | 1.77 (0.84)   | 0.0006 |
| LA/DHA ratio <sup>3</sup>        | 56.67 (28.11) | 49.22 (21.68) | 45.43 (23.66) | 40.98 (21.26) | 0.0012 |

#### Fatty acids with leaves

|                                  |               |               |               |               |        |
|----------------------------------|---------------|---------------|---------------|---------------|--------|
| Energy (kcal/100ml) <sup>2</sup> | 56.92 (11.09) | 57.97 (9.1)   | 56.56 (10.61) | 58.50 (10.96) | 0.6446 |
| Lactose (g/100ml) <sup>2</sup>   | 6.79 (0.16)   | 6.80 (0.16)   | 6.81 (0.19)   | 6.81 (0.13)   | 0.8652 |
| Protein (g/100ml) <sup>2</sup>   | 0.88 (0.17)   | 0.90 (0.20)   | 0.88 (0.17)   | 0.92 (0.18)   | 0.6361 |
| Fat (g/100ml) <sup>2</sup>       | 3.02 (1.40)   | 3.13 (1.13)   | 2.96 (1.32)   | 3.19 (1.36)   | 0.7139 |
| SFA (% of FA) <sup>3</sup>       | 43.29 (5.1)   | 42.54 (4.69)  | 41.30 (5.28)  | 40.54 (4.06)  | 0.0035 |
| MUFA (% of FA) <sup>3</sup>      | 43.14 (4.99)  | 43.36 (4.52)  | 44.49 (4.70)  | 45.21 (4.75)  | 0.0322 |
| PUFA (% of FA) <sup>3</sup>      | 13.11 (2.57)  | 13.67 (2.46)  | 13.79 (2.51)  | 13.80 (2.54)  | 0.3194 |
| ω-6 (% of FA) <sup>3</sup>       | 12.03 (2.52)  | 12.44 (2.45)  | 12.53 (2.54)  | 12.54 (2.53)  | 0.5703 |
| LA (% of FA) <sup>3</sup>        | 10.52 (2.47)  | 10.93 (2.39)  | 11.02 (2.43)  | 11.10 (2.46)  | 0.5012 |
| AA (% of FA) <sup>3</sup>        | 0.47 (0.08)   | 0.48 (0.09)   | 0.48 (0.09)   | 0.45 (0.07)   | 0.0637 |
| ω-3 (% FA) <sup>3</sup>          | 1.09 (0.23)   | 1.23 (0.53)   | 1.25 (0.47)   | 1.26 (0.47)   | 0.0735 |
| ALA (% of FA) <sup>3</sup>       | 0.49 (0.14)   | 0.52 (0.16)   | 0.57 (0.18)   | 0.58 (0.17)   | 0.0032 |
| EPA (% of FA) <sup>3</sup>       | 0.05 (0.02)   | 0.06 (0.06)   | 0.06 (0.05)   | 0.05 (0.04)   | 0.1971 |
| DHA (% of FA) <sup>3</sup>       | 0.26 (0.10)   | 0.32 (0.26)   | 0.30 (0.20)   | 0.29 (0.28)   | 0.3732 |
| DPA (% of FA) <sup>3</sup>       | 0.11 (0.03)   | 0.13 (0.06)   | 0.12 (0.06)   | 0.12 (0.07)   | 0.1001 |
| ω-6/ω-3 ratio <sup>3</sup>       | 11.49 (3.06)  | 11.35 (4.42)  | 11.03 (3.82)  | 10.83 (3.39)  | 0.7085 |
| LA/ALA ratio <sup>3</sup>        | 22.79 (7.01)  | 23.08 (8.77)  | 21.00 (6.79)  | 20.57 (6.64)  | 0.1068 |
| AA/EPA ratio <sup>3</sup>        | 11.70 (4.49)  | 10.93 (5.23)  | 11.22 (5.06)  | 10.94 (4.48)  | 0.7588 |
| EPA/DHA ratio <sup>3</sup>       | 0.19 (0.07)   | 0.19 (0.06)   | 0.20 (0.07)   | 0.19 (0.06)   | 0.7609 |
| AA/DHA ratio <sup>3</sup>        | 2.05 (0.72)   | 1.95 (0.91)   | 2.08 (0.96)   | 1.96 (0.80)   | 0.7777 |
| LA/DHA ratio <sup>3</sup>        | 45.91 (17.85) | 46.08 (27.57) | 49.80 (28.13) | 49.32 (22.34) | 0.6746 |

#### Starch and vegetable proteins

|                                  |              |               |               |              |        |
|----------------------------------|--------------|---------------|---------------|--------------|--------|
| Energy (kcal/100ml) <sup>2</sup> | 57.92 (9.93) | 57.80 (10.85) | 58.62 (11.13) | 55.61 (9.81) | 0.3238 |
| Lactose (g/100ml) <sup>2</sup>   | 6.79 (0.16)  | 6.79 (0.15)   | 6.80 (0.17)   | 6.83 (0.16)  | 0.3826 |
| Protein (g/100ml) <sup>2</sup>   | 0.91 (0.21)  | 0.88 (0.18)   | 0.87 (0.17)   | 0.93 (0.15)  | 0.2088 |
| Fat (g/100ml) <sup>2</sup>       | 3.13 (1.22)  | 3.11 (1.35)   | 3.22 (1.41)   | 2.84 (1.22)  | 0.3011 |
| SFA (% of FA) <sup>3</sup>       | 42.30 (6.03) | 41.29 (4.64)  | 41.66 (4.12)  | 42.47 (4.69) | 0.4538 |
| MUFA (% of FA) <sup>3</sup>      | 43.71 (5.58) | 44.30 (4.82)  | 44.17 (4.38)  | 43.99 (4.42) | 0.9003 |

|                             |               |               |               |               |        |
|-----------------------------|---------------|---------------|---------------|---------------|--------|
| PUFA (% of FA) <sup>3</sup> | 13.53 (2.34)  | 13.99 (2.77)  | 13.74 (2.70)  | 13.10 (2.19)  | 0.2011 |
| ω-6 (% of FA) <sup>3</sup>  | 12.24 (2.32)  | 12.76 (2.73)  | 12.58 (2.66)  | 11.96 (2.26)  | 0.2378 |
| LA (% of FA) <sup>3</sup>   | 10.77 (2.30)  | 11.25 (2.65)  | 11.09 (2.58)  | 10.44 (2.13)  | 0.2052 |
| AA (% of FA) <sup>3</sup>   | 0.46 (0.09)   | 0.47 (0.07)   | 0.47 (0.08)   | 0.47 (0.10)   | 0.9371 |
| ω-3 (% FA) <sup>3</sup>     | 1.29 (0.58)   | 1.23 (0.39)   | 1.16 (0.40)   | 1.14 (0.38)   | 0.1966 |
| ALA (% of FA) <sup>3</sup>  | 0.55 (0.18)   | 0.54 (0.17)   | 0.53 (0.16)   | 0.52 (0.15)   | 0.7468 |
| EPA (% of FA) <sup>3</sup>  | 0.06 (0.05)   | 0.06 (0.04)   | 0.05 (0.05)   | 0.05 (0.03)   | 0.3639 |
| DHA (% of FA) <sup>3</sup>  | 0.34 (0.34)   | 0.31 (0.18)   | 0.27 (0.16)   | 0.27 (0.14)   | 0.1378 |
| DPA (% of FA) <sup>3</sup>  | 0.13 (0.08)   | 0.12 (0.04)   | 0.12 (0.05)   | 0.11 (0.05)   | 0.4400 |
| ω-6/ω-3 ratio <sup>3</sup>  | 10.55 (3.90)  | 11.23 (3.82)  | 11.55 (3.38)  | 11.33 (3.71)  | 0.4126 |
| LA/ALA ratio <sup>3</sup>   | 21.19 (7.52)  | 22.39 (7.86)  | 22.35 (7.52)  | 21.51 (6.75)  | 0.7053 |
| AA/EPA ratio <sup>3</sup>   | 10.38 (4.66)  | 10.65 (4.44)  | 11.47 (4.85)  | 12.25 (5.13)  | 0.0910 |
| EPA/DHA ratio <sup>3</sup>  | 0.19 (0.07)   | 0.19 (0.06)   | 0.20 (0.07)   | 0.18 (0.05)   | 0.6127 |
| AA/DHA ratio <sup>3</sup>   | 1.83 (0.78)   | 1.96 (0.87)   | 2.09 (0.78)   | 2.15 (0.94)   | 0.1282 |
| LA/DHA ratio <sup>3</sup>   | 44.50 (26.08) | 48.11 (26.07) | 48.98 (18.36) | 49.37 (26.19) | 0.6272 |

<sup>1</sup>p-value from ANOVA comparing means across quartiles of the dietary pattern. <sup>2</sup>This component was missing in 1 subject.

<sup>3</sup>This component was missing in 18 subjects.

AA: arachidonic acid; ALA: α-linolenic acid; DHA: docosahexaenoic acid; DPA: docosapentaenoic acid; EPA: eicosapentaenoic acid; FA: fatty acids; LA: linoleic acid; MUFA: monounsaturated fatty acids; PUFA: polyunsaturated fatty acids; Q1: 1st quartile of the dietary pattern; Q2: 2nd quartile of the dietary pattern; Q3: 3rd quartile of the dietary pattern; Q4: 4th quartile of the dietary pattern; SD: standard deviation; SFA: saturated fatty acids.
